# Supplementary material
Source: publisher site journal article supplement (https://www.dovepress.com/get_supplementary_file.php?f=468644.docx)
Supplement: Supplementary file 1 [file get_supplementary_file.php]

| **Characteristics** | ***n*** | ***%*** | **Characteristics** | ***n*** | ***%*** |
| --- | --- | --- | --- | --- | --- |
| **Age,years** |  |  | ≤1 | 24 | 11.3 |
| <35 | 159 | 74.6 | 1-5 | 96 | 45.1 |
| ≥35 | 54 | 25.4 | ≥5 | 93 | 43.7 |
| **Education** |  |  | **Previous infertility treatment, times** |  |  |
| Primary school and below | 10 | 4.7 | 0 | 26 | 12.2 |
| Middle or high school | 62 | 29.1 | 1 | 94 | 44.1 |
| Junior college | 61 | 28.6 | 2 | 45 | 21.1 |
| Undergraduate | 69 | 32.4 | ≥3 | 48 | 22.5 |
| graduate or above | 11 | 5.2 | **Duration of infertility treatment, months** |  |  |
| **Profession** |  |  | ＜6 | 87 | 40.9 |
| Public Institution | 19 | 8.9 | 6-12 | 70 | 32.9 |
| Enterprise | 84 | 39.4 | ＞12 | 56 | 26.3 |
| Privately or individually-owned business | 28 | 13.2 | **Adverse pregnancy history** |  |  |
| Unemployed | 82 | 38.5 | No | 117 | 54.9 |
| **Place of residence** |  |  | Yes | 96 | 45.1 |
| Countryside | 78 | 36.6 | **Financial burden during treatment** |  |  |
| City | 135 | 63.4 | No | 61 | 28.6 |
| **Monthly family income, RMB** |  |  | Yes | 152 | 71.4 |
| ＜3000 | 14 | 6.6 | **Underlying disease** |  |  |
| 3000-5000 | 87 | 40.9 | No | 166 | 77.9 |
| 5001-10000 | 62 | 29.1 | Yes | 47 | 22.1 |
| >10000 | 50 | 23.5 | **Source of reproductive pressure** |  |  |
| **Monthly family income, RMB** |  |  | Self | 63 | 29.6 |
| 0 | 95 | 44.6 | Others | 84 | 39.4 |
| 1 | 48 | 22.5 | Both | 66 | 31.0 |
| ≥2 | 70 | 32.9 | **Cause of infertility** |  |  |
| **Parity, times** |  |  | Male factor | 19 | 8.9 |
| 0 | 168 | 78.9 | Female factor | 110 | 51.6 |
| ≥1 | 45 | 21.1 | Combined factors | 35 | 16.4 |
| **Duration of infertility, years** |  |  | Unexplained | 49 | 23.0 |

**Supplementary table 1** Demographic and Clinical Characteristics of the Participants(*n* = 213)

**Supplementary table 2** Prevalence and Severity of Symptoms in Patients undergoing ART(*n* = 213)

| **Symptoms** | **Occurrence rate *n*(%)** | **Severity *M(Q1,Q3)*** | **Symptoms** | **Occurrence rate *n*(%)** | **Severity *M(Q1,Q3)*** |
| --- | --- | --- | --- | --- | --- |
| Trouble remembering things | 174(81.7) | 2.0(2.0,3.0) | Having to do things very slowly to insure correctness | 101(47.4) | 1.0(1.0,2.0) |
| Feeling easily annoyed or irritated | 173(81.2) | 2.0(2.0,3.0) | The idea that something serious is wrong with your body | 100(46.9) | 1.0(1.0,2.0) |
| Feeling low in energy or slowed down | 151(70.9) | 2.0(1.0,3.1) | Feeling that most people cannot be trusted | 97(45.5) | 1.0(1.0,2.0) |
| Having to check and double-check what you do | 143(67.1) | 2.0(1.0,2.0) | Poor appetite | 97(45.5) | 1.0(1.0,2.0) |
| Worrying too much about things | 142(66.7) | 2.0(1.0,3.0) | Having to avoid certain things, places, or activities because they frighten you | 96(45.1) | 1.0(1.0,2.0) |
| Crying easily | 137(64.3) | 2.0(1.0,2.0) | Your mind going blank | 92(43.2) | 1.0(1.0,2.0) |
| Pains in lower back | 137(64.3) | 2.0(1.0,2.0) | Feeling hopeless about the future | 87(40.8) | 1.0(1.0,2.0) |
| Trouble falling asleep | 136(63.8) | 2.0(1.0,2.0) | The idea that you should be punished for your sins | 84(39.4) | 1.0(1.0,2.0) |
| Difficulty making decisions | 133(62.4) | 1.0(1.0,2.0) | Heart pounding or racing | 84(39.4) | 1.0(1.0,2.0) |
| Nervousness or shakiness inside | 131(61.5) | 2.0(1.0,2.0) | Headaches | 83(39.0) | 1.0(1.0,2.0) |
| Feeling tense or keyed up | 129(60.6) | 2.0(1.0,2.0) | Feeling everything is an effort | 82(38.5) | 1.0(1.0,2.0) |
| Temper outbursts that you could not control | 124(58.2) | 2.0(1.0,2.5) | Having thoughts that are not your own | 82(38.5) | 1.0(1.0,2.0) |
| Sleep that is restless or disturbed | 123(57.7) | 2.0(1.0,2.0) | Pains in heart or chest | 82(38.5) | 1.0(1.0,2.0) |
| Feeling blue | 122(57.3) | 2.0(1.0,2.0) | Feelings of worthlessness | 81(38.0) | 1.0(1.0,2.0) |
| Feeling blocked in getting things done | 122(57.3) | 2.0(1.0,2.0) | Other people being aware of your private thoughts | 81(38.0) | 1.0(1.0,2.0) |
| Unwanted thoughts, words, or ideas that won't leave your mind | 119(55.9) | 2.0(1.0,2.0) | The idea that someone else can control your thoughts | 80(37.6) | 1.0(1.0,2.0) |
| Overeating | 118(55.4) | 1.0(1.0,2.0) | Feeling shy or uneasy with the opposite sex | 79(37.1) | 1.0(1.0,2.0) |
| Feeling no interest in things | 114(53.5) | 2.0(1.0,2.0) | Getting into frequent arguments | 78(36.6) | 1.0(1.0,2.0) |
| Feeling uneasy when people are watching or talking about you | 114(53.5) | 2.0(1.0,2.0) | Feeling afraid to go out of your house alone | 78(36.6) | 1.0(1.0,2.0) |
| Feeling lonely | 113(53.1) | 2.0(1.0,2.0) | Thoughts of death or dying | 76(35.7) | 1.0(1.0,2.0) |
| Feeling others are to blame for most of your troubles | 113(53.1) | 2.0(1.0,2.0) | Feeling that people are unfriendly or dislike you | 76(35.7) | 1.0(1.0,2.0) |
| Feeling inferior to others | 110(51.6) | 2.0(1.0,2.0) | Feeling so restless you couldn't sit still | 75(35.2) | 1.0(1.0,2.0) |
| Worried about sloppiness or carelessness | 109(51.2) | 2.0(1.0,2.0) | Suddenly scared for no reason | 75(35.2) | 1.0(1.0,2.0) |
| Feeling pushed to get things done | 108(50.7) | 2.0(1.0,2.0) | Never feeling close to another person | 74(34.7) | 1.0(1.0,2.0) |
| Trouble concentrating | 107(50.2) | 2.0(1.0,2.0) | Heavy feelings in your arms or legs | 74(34.7) | 1.0(1.0,2.0) |
| Feeling critical of others | 107(50.2) | 1.0(1.0,2.0) | Feeling lonely even when you are with people | 72(33.8) | 1.0(1.0,2.0) |
| Blaming yourself for things | 106(49.8) | 1.0(1.0,2.0) | Feeling that familiar things are strange or unreal | 72(33.8) | 1.0(1.0,2.0) |
| Your feelings being easily hurt | 106(49.8) | 2.0(1.0,2.0) | Others not giving you proper credit for your achievements | 71(33.3) | 1.0(1.0,2.0) |
| Awakening in the early morning | 104(48.8) | 1.0(1.0,2.0) | Having ideas or beliefs that others do not share | 69(32.4) | 1.0(1.0,2.0) |
| Nausea or upset stomach | 104(48.8) | 1.0(1.0,2.0) | A lump in your throat | 69(32.4) | 1.0(1.0,2.0) |
| Soreness of your muscles | 104(48.8) | 1.0(1.0,2.0) | Feeling very self-conscious with others | 68(31.9) | 1.0(1.0,2.0) |
| Loss of sexual interest or pleasure | 103(48.4) | 2.0(1.0,2.0) | The idea that something is wrong with your mind | 66(31.0) | 1.0(1.0,2.0) |
| Feeling weak in parts of your body | 103(48.4) | 1.0(1.0,2.0) | Having thoughts about sex that bother you a lot | 64(30.0) | 1.0(1.0,2.0) |
| Feeling fearful | 103(48.4) | 1.0(1.0,2.0) | Feeling that you are watched or talked about by others | 60(28.2) | 2.0(1.0,2.0) |
| Feeling others do not understand you or are unsympathetic | 102(47.9) | 1.0(1.0,2.0) |  |  |  |
